# Supplementary material for: Fluorinated fused nonacyclic interfacial materials for efficient and stable perovskite solar cells
Source: Royal Society of Chemistry journal article supplement (doi:10.1039/c7ta06923e), 2017-01-01
Supplement: c7ta06923e1.pdf [file c7ta06923e1.pdf]

Electronic supplementary information

**Fluorinated fused nonacyclic interfacial materials for efficient and stable perovskite solar cells**

Kuan Liu<sup>ab</sup>, Shuixing Dai<sup>a</sup>, Fanqi Meng<sup>a</sup>, Jiangjian Shi<sup>b</sup>, Yusheng Li<sup>b</sup>, Jionghua Wu<sup>b</sup>, Qingbo Meng<sup>b\*</sup>  
and Xiaowei Zhan<sup>a\*</sup>

<sup>a</sup> *Department of Materials Science and Engineering, College of Engineering, Key Laboratory of Polymer Chemistry and Physics of Ministry of Education, Peking University, Beijing 100871, China.*

*\*E-mail: xwzhan@pku.edu.cn*

<sup>b</sup> *CAS Key Laboratory for Renewable Energy, Beijing Key Laboratory for New Energy Materials and Devices, Institute of Physics, Chinese Academy of Sciences, Beijing 100190, China. \*E-mail: qbmeng@iphy.ac.cn*

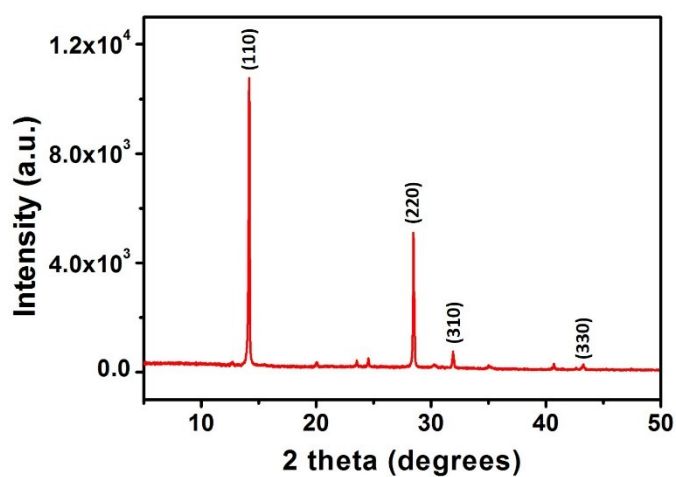

**Fig. S1** XRD pattern of  $\text{MAPbI}_{3-x}\text{Cl}_x$  based perovskite thin film on ITO/PEDOT:PSS substrate.

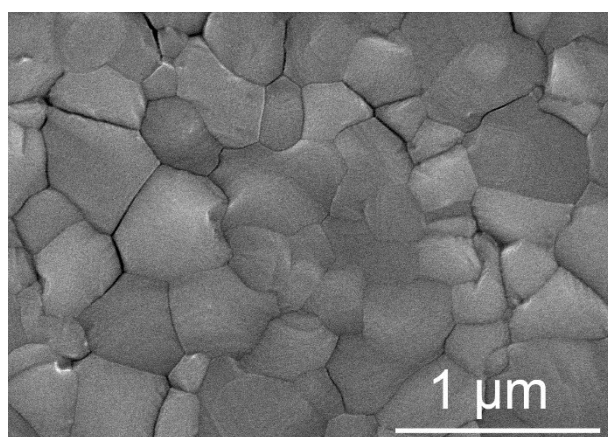

**Fig. S2** SEM image of  $\text{MAPbI}_{3-x}\text{Cl}_x$  based perovskite thin film on ITO/PEDOT:PSS substrate.

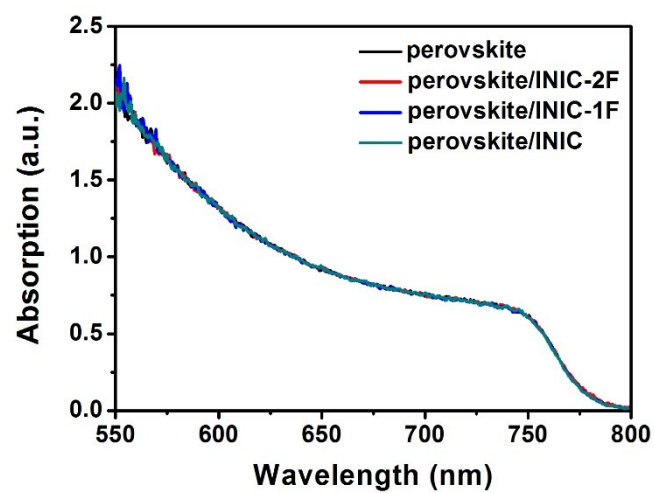

**Fig. S3** UV-vis absorption spectra of the neat perovskite and INIC series coated perovskite films.

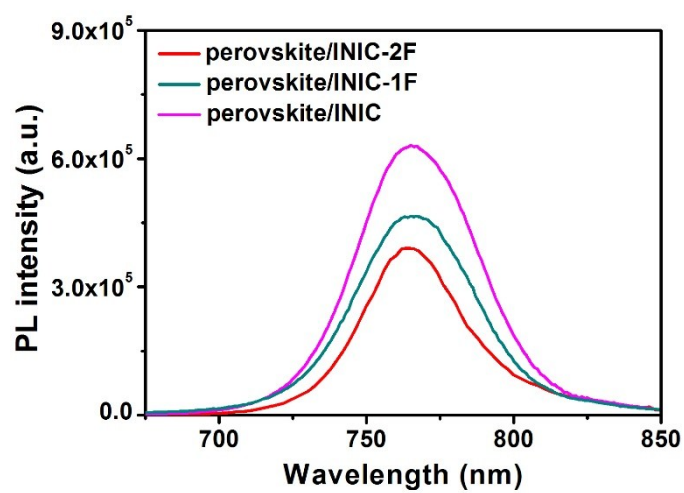

**Fig. S4** Steady-state PL spectra of the INIC series coated perovskite films.

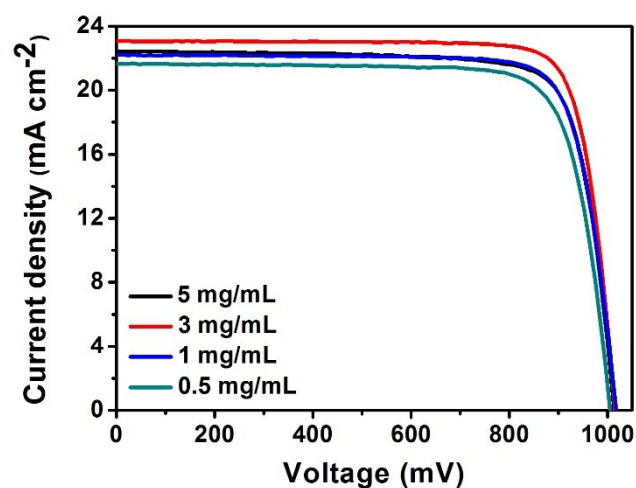

**Fig. S5**  $J$ - $V$  curves of modified devices with INIC-2F interfacial layer deposited with its solution under different concentrations.

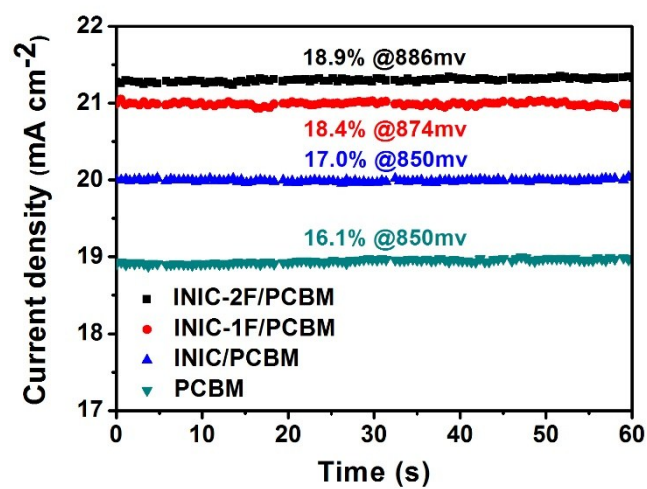

**Fig. S6** Steady-state current density and power output of the best-performing modified devices with and without INIC series interfacial layer.

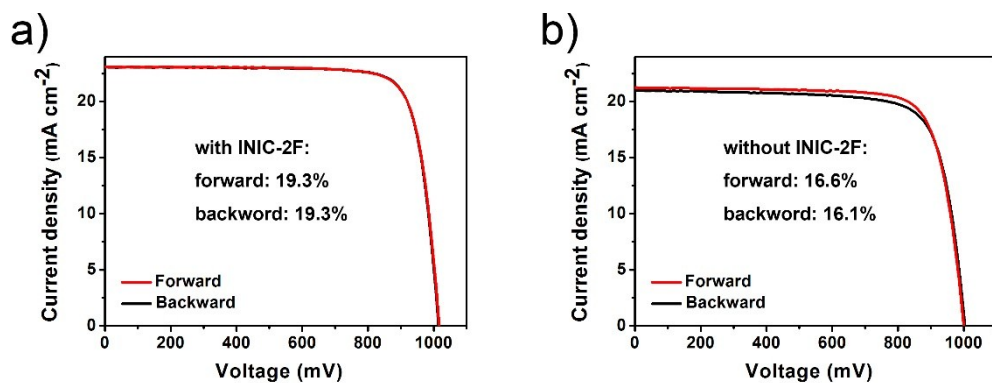

**Fig. S7** The hysteresis effect in  $J-V$  curves of the inverted planar PSCs (a) with and (b) without INIC-2F interfacial layer.

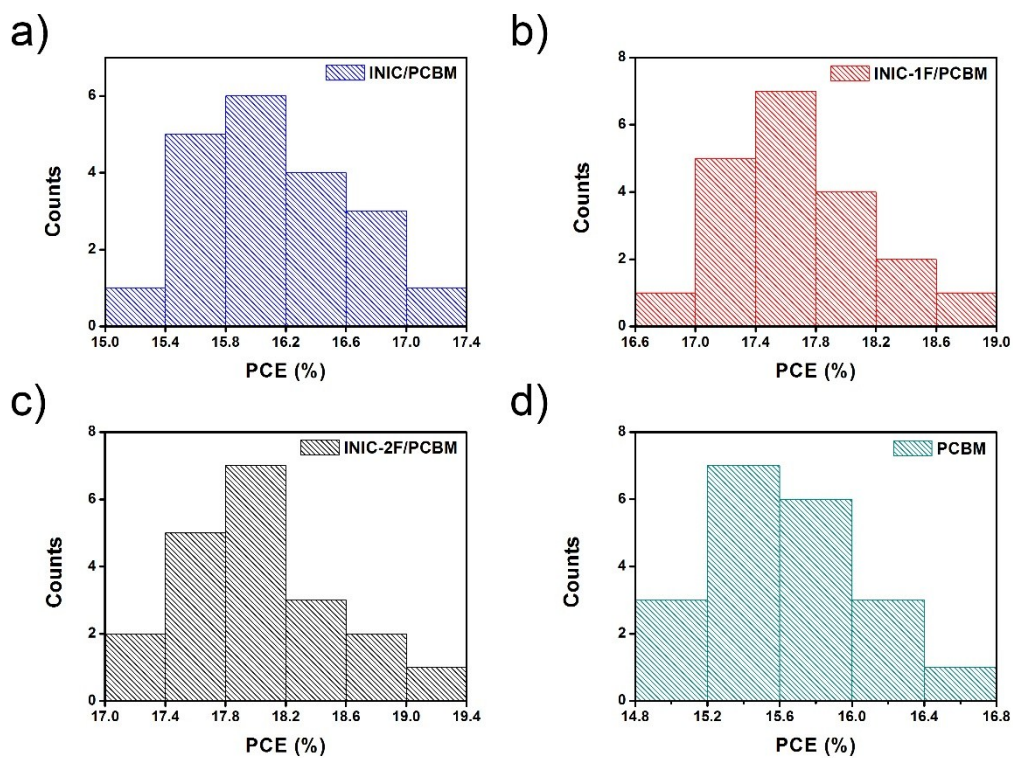

**Fig. S8** Statistical PCE distribution histogram of 20 individual devices based on INIC series interfacial layers and the control devices without INIC series.

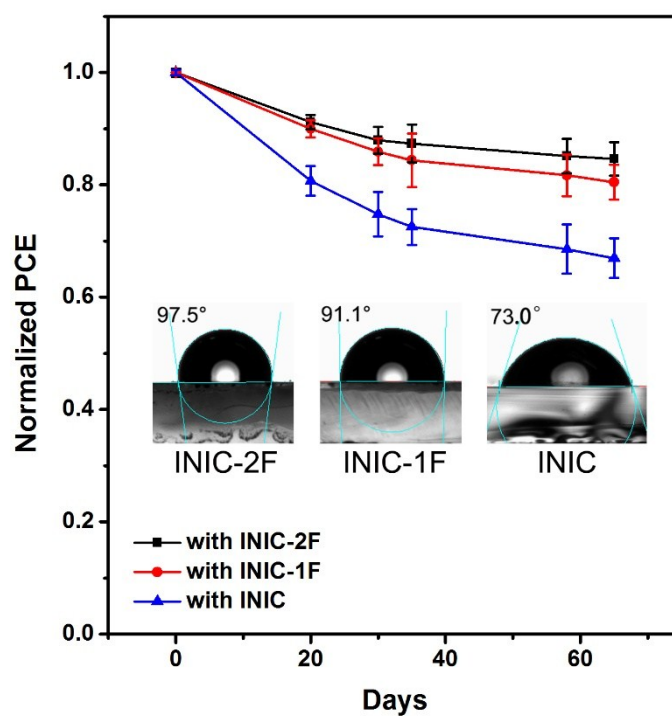

**Fig. S9** Stability test of the unencapsulated devices based on INIC-2F, INIC-1F and INIC interfacial layer, stored under ambient condition ( $20 \pm 5$  °C,  $20 \pm 5$  % relative humidity). Inset, water contact angle of the perovskite/INIC series thin films.

**Table S1** Fitting parameters of bi-exponential decay function in time-resolved PL spectra.

| Films                   | $A_1$ | $\tau_1$ (ns) | $A_2$ | $\tau_2$ (ns) | Average           |
|-------------------------|-------|---------------|-------|---------------|-------------------|
|                         |       |               |       |               | decay time $\tau$ |
|                         |       |               |       |               | (ns) <sup>a</sup> |
| Perovskite              | 0.53  | 165.25        | 0.53  | 165.27        | 165.26            |
| Perovskite/INIC-2F      | 0.60  | 2.19          | 0.38  | 9.27          | 4.94              |
| Perovskite/INIC-2F/PCBM | 0.90  | 1.27          | 0.13  | 7.14          | 2.01              |

<sup>a</sup> Average decay time is calculated according to the equation:  $\tau = (A_1\tau_1 + A_2\tau_2)/(A_1 + A_2)$ .

**Table S2** Fitting parameters of bi-exponential decay function in transient photovoltage measurement.

| Films              | $A_1$ | $\tau_1$ (ms) | $A_2$ | $\tau_2$ (ms) | Average                                  |
|--------------------|-------|---------------|-------|---------------|------------------------------------------|
|                    |       |               |       |               | decay time $\tau_v$<br>(ms) <sup>a</sup> |
| Perovskite         | 0.72  | 0.05          | 0.10  | 0.70          | 0.13                                     |
| Perovskite/INIC-2F | 0.59  | 0.07          | 0.36  | 0.32          | 0.16                                     |

<sup>a</sup> Average decay time is calculated according to the equation:  $\tau_v = (A_1\tau_1 + A_2\tau_2)/(A_1 + A_2)$ .

**Table S3** Fitting parameters of bi-exponential decay function in transient photocurrent measurement.

| Films              | $A_1$ | $\tau_1$ ( $\mu$ s) | $A_2$ | $\tau_2$ ( $\mu$ s) | Average                                        |
|--------------------|-------|---------------------|-------|---------------------|------------------------------------------------|
|                    |       |                     |       |                     | decay time $\tau_c$<br>( $\mu$ s) <sup>a</sup> |
| Perovskite         | 0.78  | 0.92                | 0.78  | 0.92                | 0.92                                           |
| Perovskite/INIC-2F | 0.46  | 1.20                | 0.46  | 1.20                | 1.20                                           |

<sup>a</sup> Average decay time is calculated according to the equation:  $\tau_c = (A_1\tau_1 + A_2\tau_2)/(A_1 + A_2)$

**Table S4** Photovoltaic parameters of the modified devices with INIC-2F interfacial layer deposited with its solution under different concentrations.

| Concentration (mg mL <sup>-1</sup> ) | $J_{SC}$ (mA cm <sup>-2</sup> ) | $V_{OC}$ (V) | FF (%) | PCE (%) |
|--------------------------------------|---------------------------------|--------------|--------|---------|
| 5                                    | 22.4                            | 1.01         | 79.5   | 18.1    |
| 3                                    | 23.1                            | 1.01         | 82.7   | 19.3    |
| 1                                    | 22.2                            | 1.01         | 80.5   | 18.1    |
| 0.5                                  | 21.7                            | 1.00         | 79.4   | 17.2    |
